# Supplementary material for: Distinct anti-oncogenic effect of various microRNAs in different mouse models of liver cancer
Source: PubMed Central journal article supplement (PMC4466663; doi:10.18632/oncotarget.3166), 2015-02-09
Supplement: oncotarget-06-6977-s001.pdf [file oncotarget-06-6977-s001.pdf]

SUPPLEMENTARY FIGURES AND TABLES

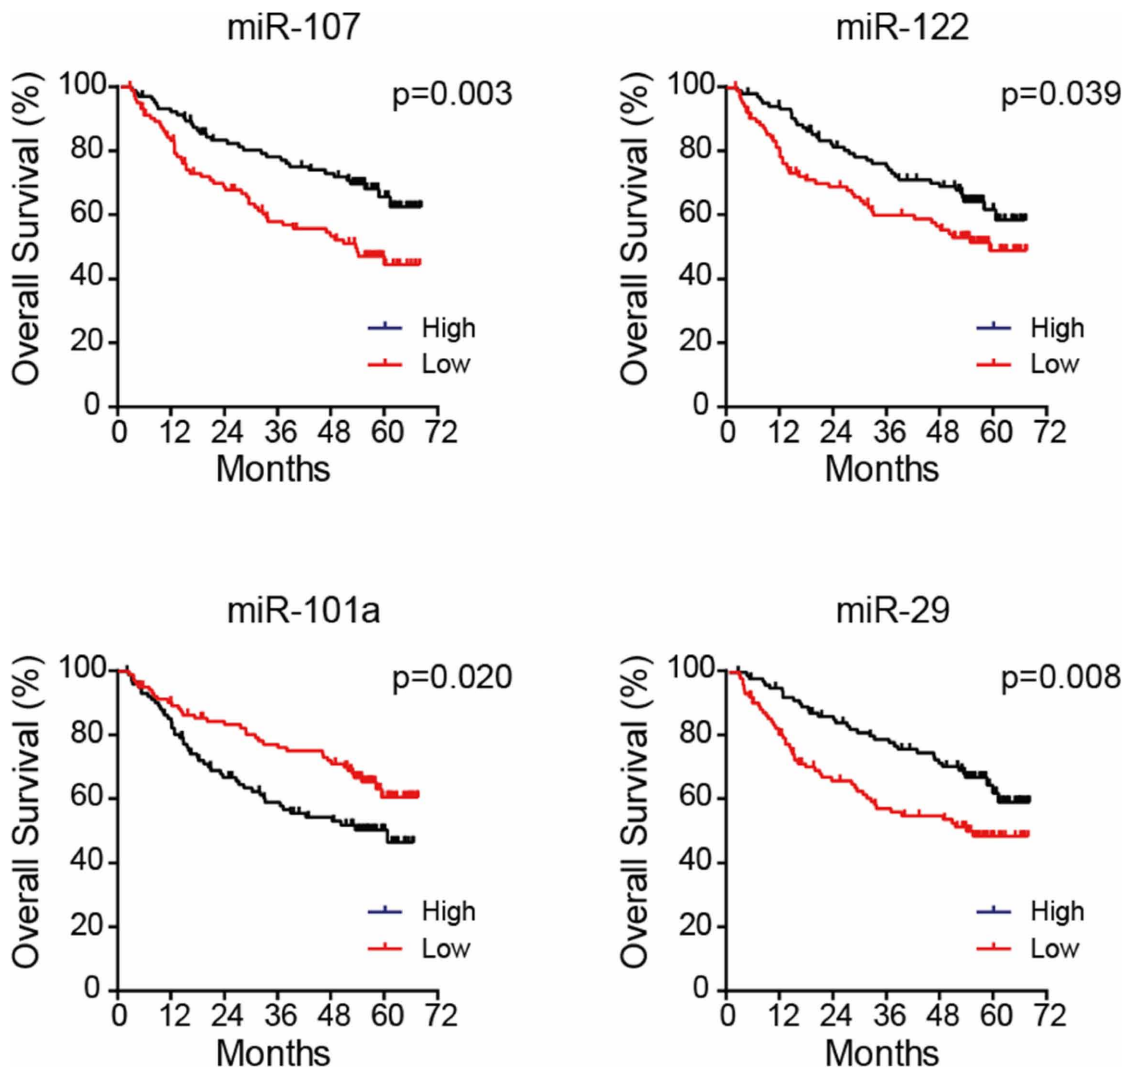

Supplementary Figure 1: Kaplan-Meier curves showing that the expression of miR-107, miR-122, miR-101 and miR-29 in liver tumors is significantly associated with the patients' outcome.

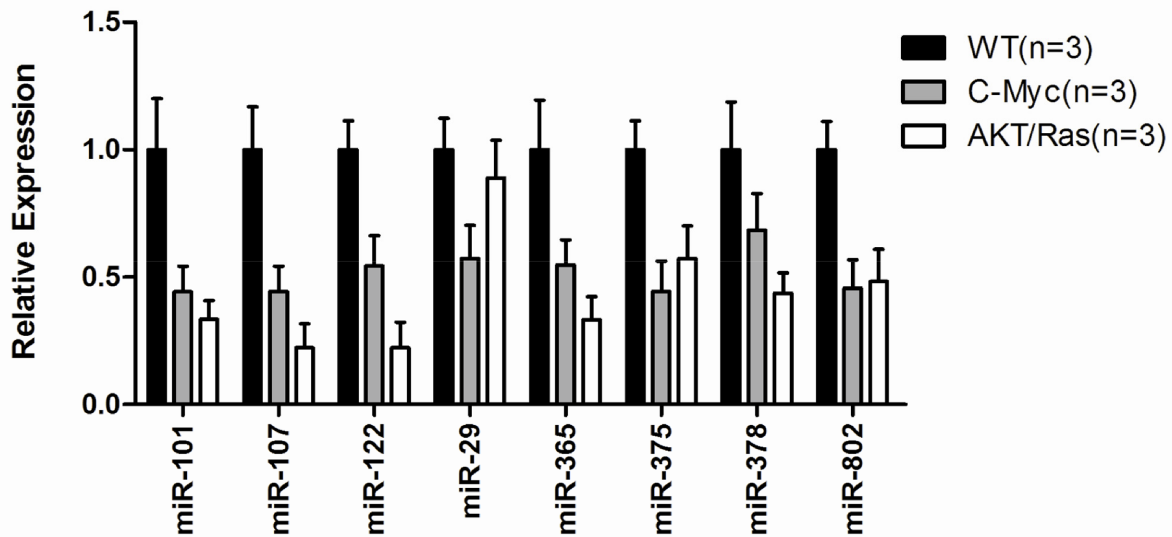

Supplementary Figure 2: Quantitative real-time RT-PCR data showing that miR-101, miR-107, miR-122, miR-29, miR-365, miR-375, miR-378, and miR-802 are all downregulated in c-Myc and AKT/Ras liver tumor tissues.

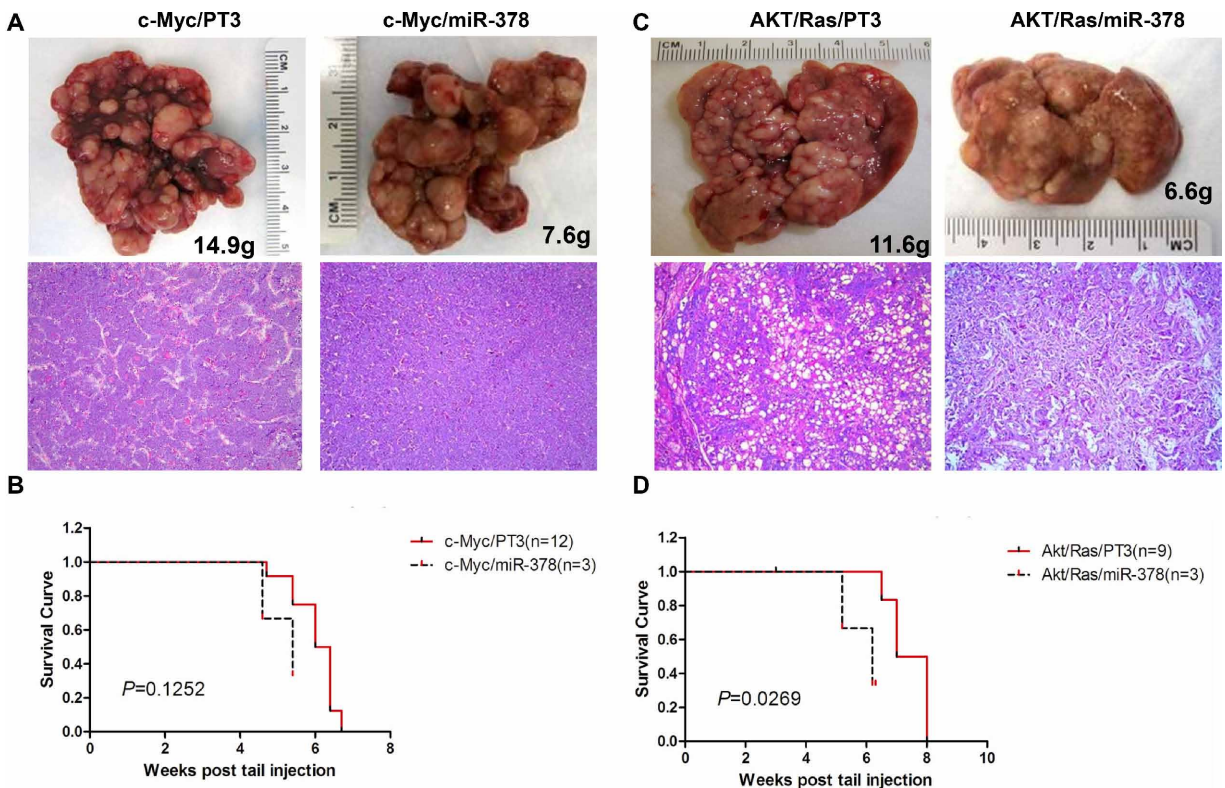

Supplementary Figure 3: Lack of tumor suppressor activity of miR-378 in c-Myc and AKT/Ras induced liver tumor formation in mice. (A) Macroscopic (upper panel) and microscopic (lower panel) appearance of livers from c-Myc/PT3 mice and c-Myc/miR-378 mice stained with H&E (100X). (B) Kaplan Meier curve showing that co-expressing miR-378 does not inhibit c-Myc induced liver tumor development. (C) Macroscopic (upper panel) and microscopic (lower panel) appearance of livers from AKT/Ras/PT3 mice (control) and AKT/Ras/miR-378 mice stained with H&E (100X). (D) Kaplan Meier curve showing that co-expressing miR-378 does not inhibit AKT/Ras induced liver tumor formation in mice.

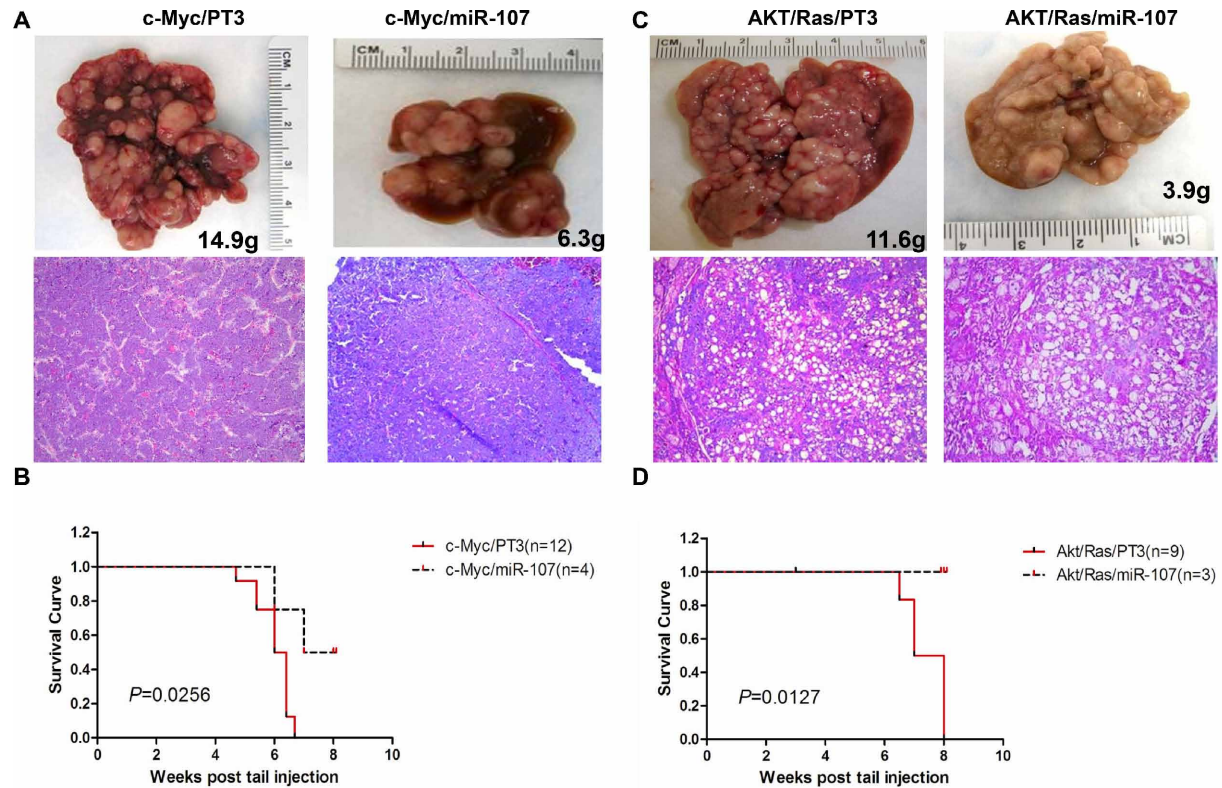

**Supplementary Figure 4: Tumor suppressor activity of miR-107 in c-Myc or AKT/Ras induced liver tumor formation.** (A) Macroscopic (upper panel) and microscopic (lower panel) appearance of livers from c-Myc/PT3 mice and c-Myc/miR-107 mice stained with H&E (100X). (B) Kaplan Meier curve shows that overexpression of miR-107 slightly delays c-Myc induced liver tumor formation. (C) Macroscopic (upper panel) and microscopic (lower panel) appearance of livers from AKT/Ras/PT3 mice and AKT/Ras/miR-107 mice stained with H&E (100X). (D) Kaplan Meier curve shows that co-expression of miR-107 strongly inhibits AKT/Ras induced liver tumor formation in mice.

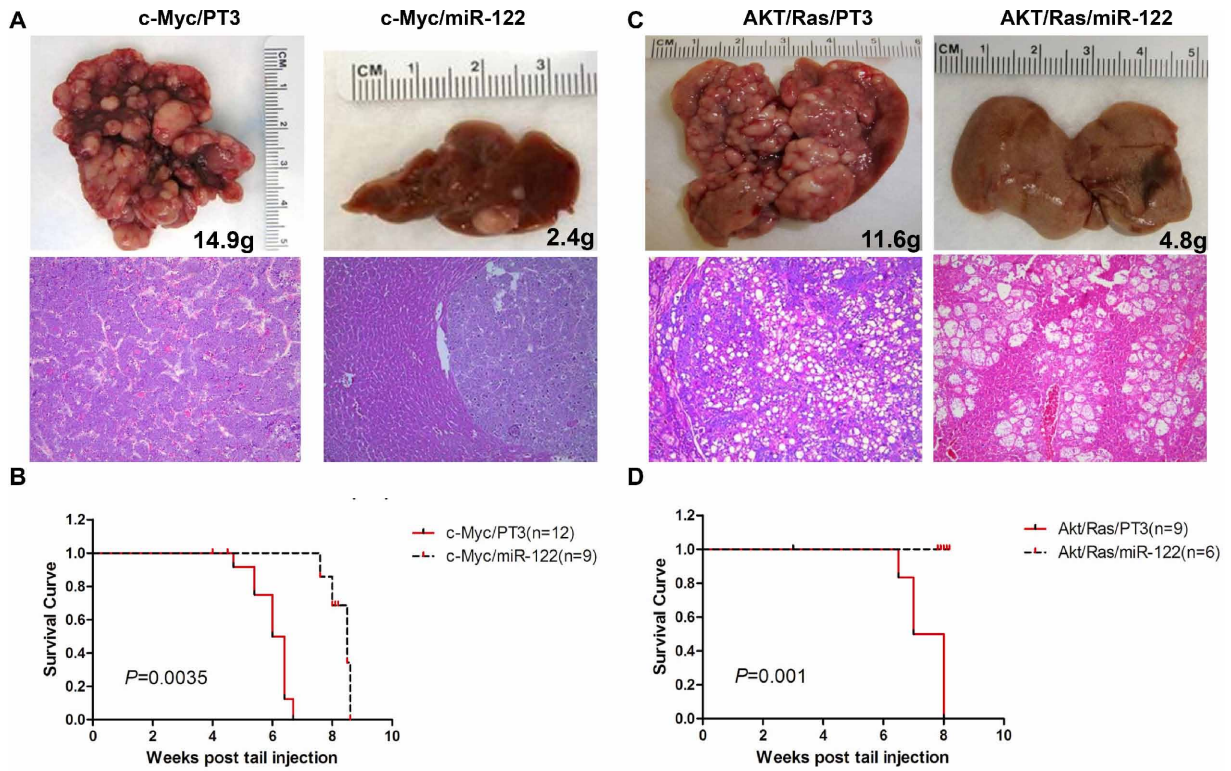

**Supplementary Figure 5: Tumor suppressor activity of miR-122 in c-Myc or AKT/Ras induced liver tumor formation.** (A) Macroscopic (upper panel) and microscopic (lower panel) appearance of livers from c-Myc/PT3 mice and c-Myc/miR-122 mice stained with H&E (100X). (B) Kaplan Meier curve shows that overexpression of miR-122 delays c-Myc induced liver tumor formation. (C) Macroscopic (upper panel) and microscopic (lower panel) appearance of livers from AKT/Ras/PT3 mice and AKT/Ras/miR-122 mice stained with H&E (100X). (D) Kaplan Meier curve shows that co-expressing miR-122 strongly inhibits AKT/Ras induced liver tumor formation in mice.

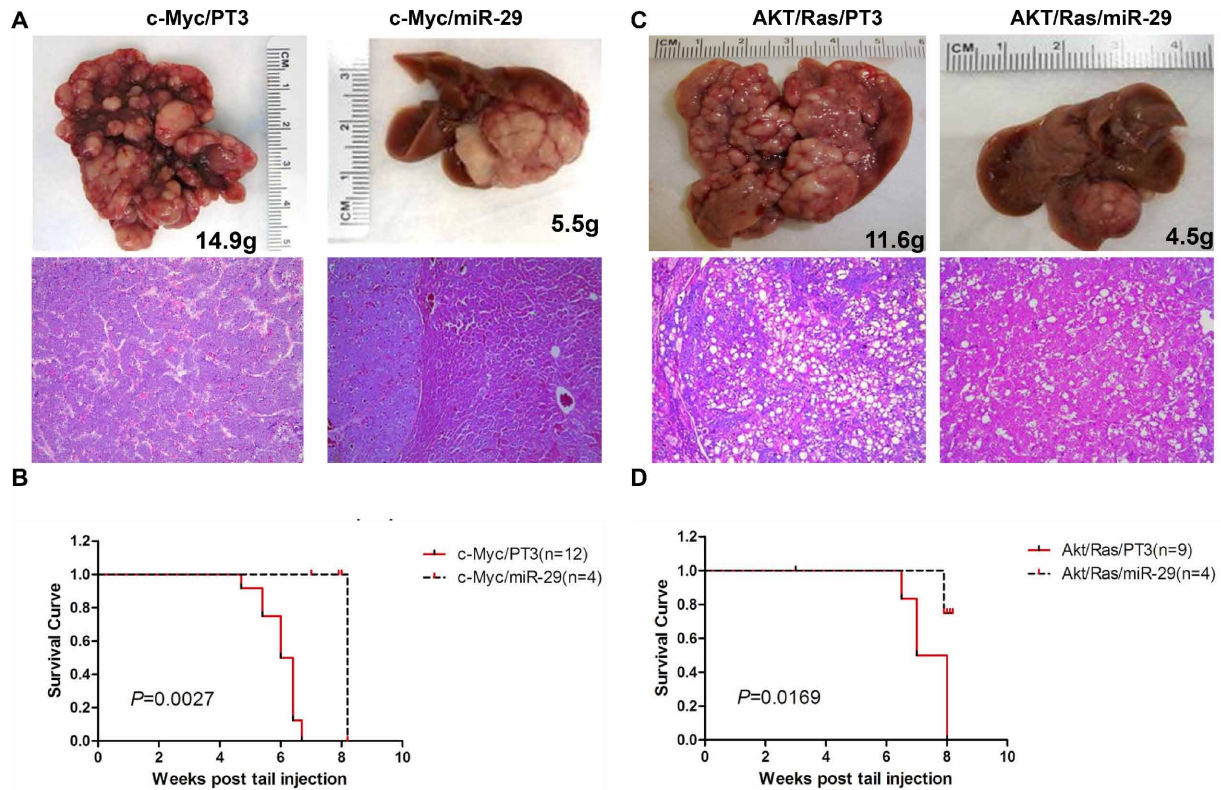

**Supplementary Figure 6: Tumor suppressor activity of miR-29 in c-Myc or AKT/Ras induced liver tumor formation. (A)** Macroscopic (upper panel) and microscopic (lower panel) appearance of livers from from c-Myc/PT3 mice and c-Myc/miR-29 mice stained with H&E (100X). **(B)** Kaplan Meier curve showing that overexpression of miR-29 slightly delays c-Myc induced liver tumor formation. **(C)** Macroscopic (upper panel) and microscopic (lower panel) appearance of livers from from AKT/Ras/PT3 mice and AKT/Ras/miR-29 mice stained with H&E (100X). **(D)** Kaplan Meier curve shows that co-expressing miR-29 slightly inhibits AKT/Ras induced liver tumor formation in mice.

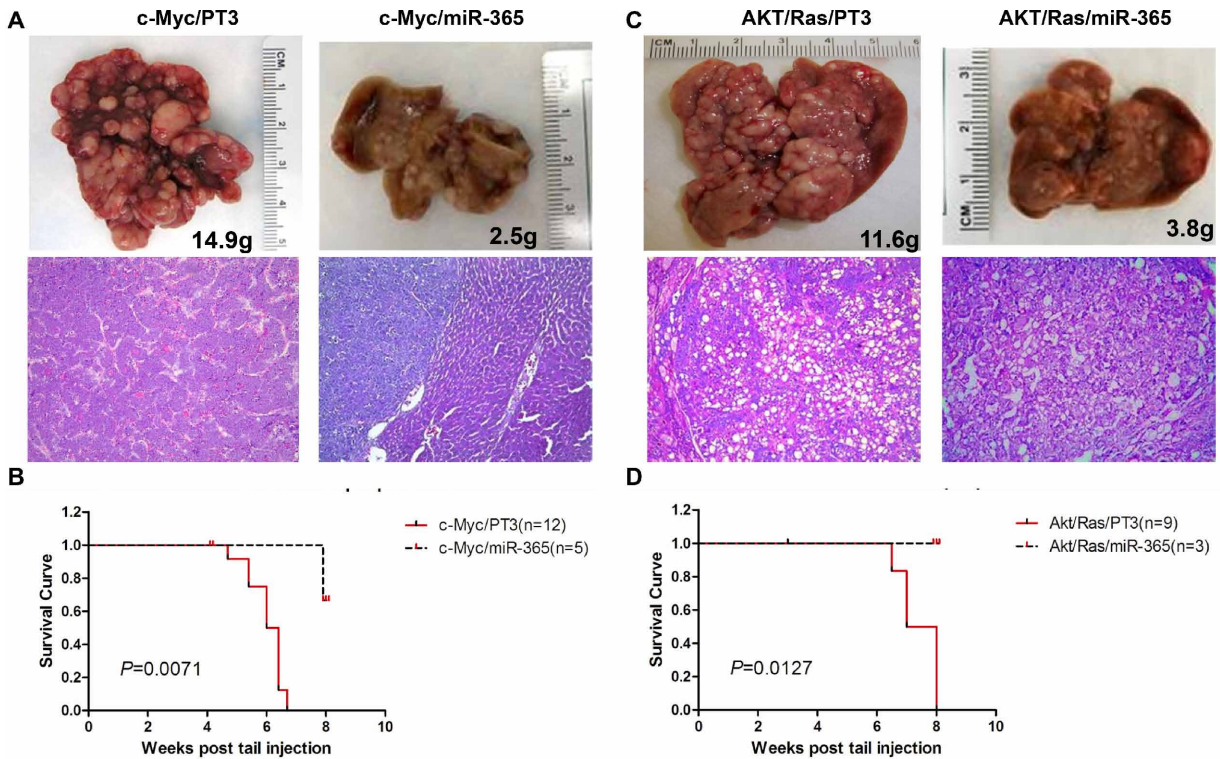

**Supplementary Figure 7: Tumor suppressor activity of miR-365 in c-Myc or AKT/Ras induced liver tumor formation.** (A) Macroscopic (upper panel) and microscopic (lower panel) appearance of livers from from c-Myc/PT3 mice and c-Myc/miR-365 mice stained with H&E (100X). (B) Kaplan Meier curve shows that overexpression of miR-365 slightly delays c-Myc induced liver tumor formation. (C) Macroscopic (upper panel) and microscopic (lower panel) appearance of livers from from AKT/Ras/PT3 mice and AKT/Ras/miR-365 mice stained with H&E (100X). (D) Kaplan Meier curve shows that co-expressing miR-365 inhibits AKT/Ras induced liver tumor formation in mice.

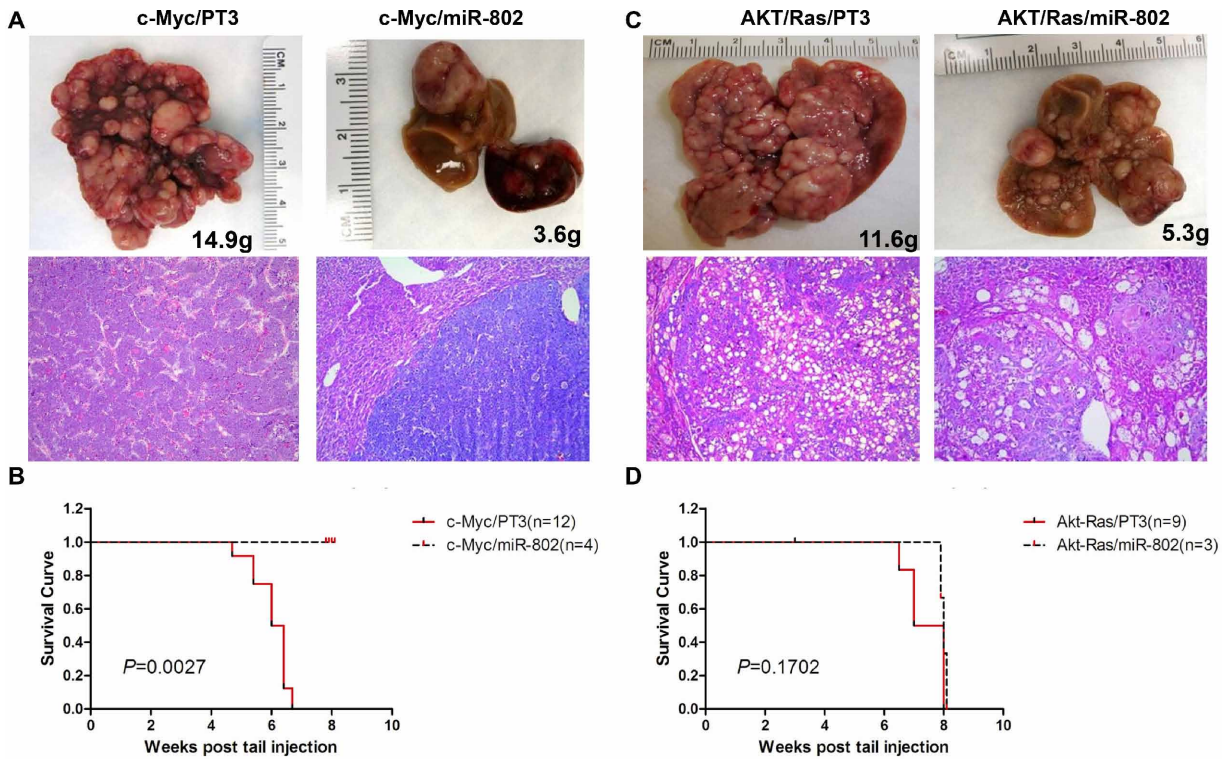

**Supplementary Figure 8: Tumor suppressor activity of miR-802 in c-Myc or AKT/Ras induced liver tumor formation.** (A) Macroscopic (upper panel) and microscopic (lower panel) appearance of livers from from c-Myc/PT3 mice and c-Myc/miR-802 mice stained with H&E (100X). (B) Kaplan Meier curve shows that overexpression of miR-802 strongly delays c-Myc induced liver tumor formation. (C) Macroscopic (upper panel) and microscopic (lower panel) appearance of livers from from AKT/Ras/PT3 mice and AKT/Ras/miR-802 mice stained with H&E (100X). (D) Kaplan Meier curve showing that co-expression of miR-802 does not affect AKT/Ras induced liver tumor formation in mice.

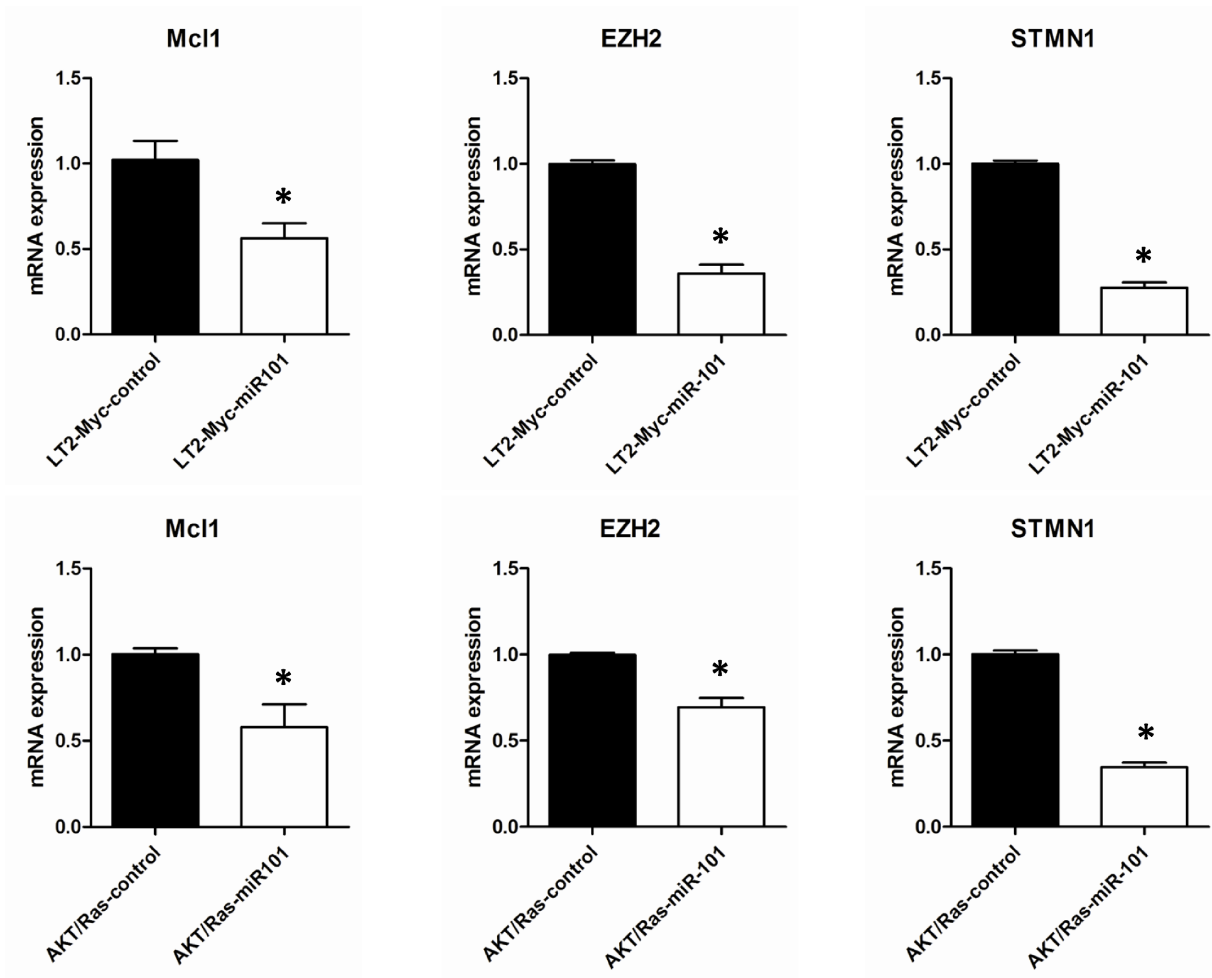

Supplementary Figure 9: Real-time RT-PCR analysis showing that overexpression of miR-101 results in the downregulation of Mcl-1, EZH2 and STMN1 putative target genes in c-Myc (upper panel) and AKT/Ras (lower panel) mouse HCC cell lines (\*represents  $P < 0.05$ ).



A

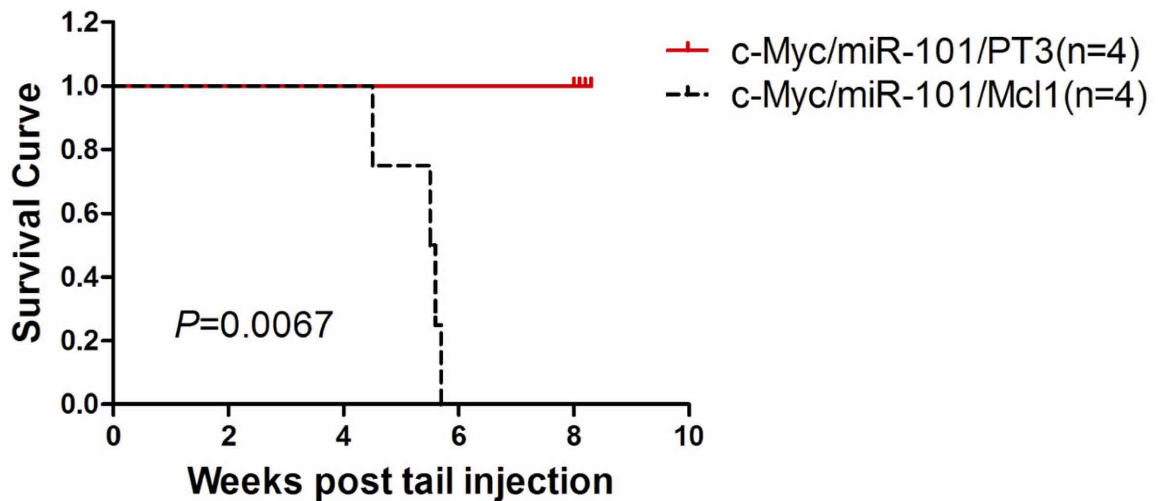

B

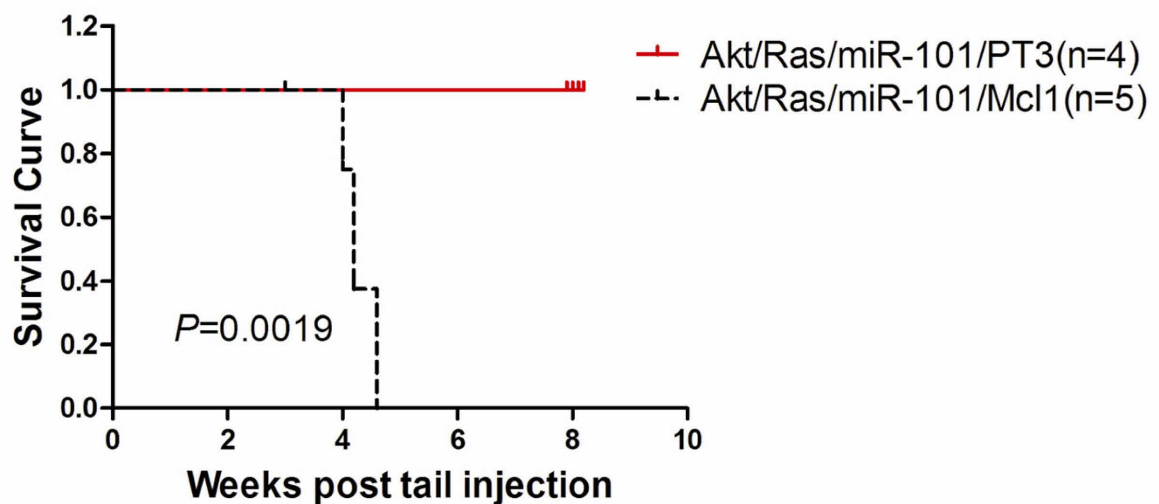

**Supplementary Figure 10: Contribution of Mcl-1 in regulating tumor suppressor activity of miR-101 in AKT/Ras and c-Myc mice.** The Mcl-1 cDNA clone lacking the 3' untranslated region, which cannot be targeted by miR-101, was cloned into pT3-EF1a vector. c-Myc/miR-101 plasmids were mixed with Mcl-1 (c-Myc/miR-101/Mcl-1) or empty vector pT3EF1a (c-Myc/miR-101/pT3), and the mixture was delivered into mouse liver via hydrodynamic transfection. Similar experiments were carried out with the AKT/Ras model. Mice were hydrodynamically transfected with AKT/Ras/miR-101/Mcl-1 or AKT/Ras/miR-101/pT3 (empty vector) construct. **(A)** Kaplan Meier curve shows that overexpression of Mcl-1 blocks the inhibitory effect of miR-101 on c-Myc induced liver tumor formation. **(B)** Kaplan Meier curve showing that co-expression of Mcl-1 suppresses the inhibitory effect of miR-101 on AKT/Ras induced liver tumor formation.

**Supplementary Table 1A: The global miRNA expression patterns were compared between normal mouse livers and those from liver tumors induced by c-Myc or AKT/Ras oncogenes**

**Supplementary Table 1B: miRNAs were significantly differently expressed between AKT/Ras tumors and normal liver tissues**

| AKT/Ras miRNA signature | available in miRNA array of human HCCs | Up/Down regulation (c-myc vs. Control) | Fold change (log <sub>2</sub> value) |
|-------------------------|----------------------------------------|----------------------------------------|--------------------------------------|
| mmu-miR-207             | yes                                    | Down                                   | -2.33                                |
| mmu-miR-192             | yes                                    | Down                                   | -1.90                                |
| mmu-miR-338-5p          | yes                                    | Down                                   | -1.56                                |
| mmu-miR-346             | yes                                    | Down                                   | -1.33                                |
| mmu-miR-1               | yes                                    | Down                                   | -1.31                                |
| mmu-miR-26a             | yes                                    | Down                                   | -1.21                                |
| mmu-miR-320             | yes                                    | Down                                   | -1.20                                |
| mmu-miR-138             | yes                                    | Down                                   | -1.19                                |
| mmu-miR-99b             | yes                                    | Up                                     | 1.05                                 |
| mmu-miR-802             | no                                     | Down                                   | -3.09                                |
| mmu-miR-1906            | no                                     | Down                                   | -2.34                                |
| mmu-miR-676             | no                                     | Down                                   | -2.01                                |
| mmu-miR-1946b           | no                                     | Down                                   | -1.97                                |
| mmu-miR-717             | no                                     | Down                                   | -1.63                                |
| mmu-miR-1933-5p         | no                                     | Down                                   | -1.59                                |
| mmu-miR-1981            | no                                     | Down                                   | -1.57                                |
| mmu-miR-1959            | no                                     | Down                                   | -1.49                                |
| mcmv-miR-m108-2-5p.1    | no                                     | Down                                   | -1.47                                |
| mmu-miR-758             | no                                     | Down                                   | -1.45                                |
| mmu-miR-1940            | no                                     | Down                                   | -1.44                                |
| mmu-miR-551b            | no                                     | Down                                   | -1.43                                |
| mghv-miR-M1-7-3p        | no                                     | Down                                   | -1.35                                |
| mmu-miR-2136            | no                                     | Down                                   | -1.35                                |
| mmu-miR-544             | no                                     | Down                                   | -1.32                                |
| mmu-miR-664             | no                                     | Down                                   | -1.32                                |
| mmu-miR-673-3p          | no                                     | Down                                   | -1.28                                |
| mmu-miR-1939            | no                                     | Down                                   | -1.03                                |
| mmu-miR-376b            | no                                     | Up                                     | 3.33                                 |

**Supplementary Table 1C: miRNAs were significantly differently expressed between c-Myc tumors and normal liver tissues**

| c-Myc miRNA signature | available in miRNA array of human HCCs | Up/Down regulation (c-myc vs. Control) | Fold change (log 2 value) |
|-----------------------|----------------------------------------|----------------------------------------|---------------------------|
| mmu-miR-148a          | yes                                    | Down                                   | -3.96                     |
| mmu-miR-29c           | yes                                    | Down                                   | -3.94                     |
| mmu-miR-22            | yes                                    | Down                                   | -3.93                     |
| mmu-miR-26b           | yes                                    | Down                                   | -2.90                     |
| mmu-miR-30a           | yes                                    | Down                                   | -2.84                     |
| mmu-miR-122           | yes                                    | Down                                   | -2.77                     |
| mmu-miR-192           | yes                                    | Down                                   | -2.73                     |
| mmu-miR-30d           | yes                                    | Down                                   | -2.60                     |
| mmu-miR-296-3p        | yes                                    | Down                                   | -2.55                     |
| mmu-miR-137           | yes                                    | Down                                   | -2.53                     |
| mmu-miR-30b           | yes                                    | Down                                   | -2.40                     |
| mmu-miR-126-5p        | yes                                    | Down                                   | -2.38                     |
| mmu-miR-139-5p        | yes                                    | Down                                   | -2.22                     |
| mmu-miR-29a           | yes                                    | Down                                   | -2.20                     |
| mmu-miR-30e           | yes                                    | Down                                   | -2.15                     |
| mmu-miR-29b           | yes                                    | Down                                   | -2.08                     |
| mmu-miR-26a           | yes                                    | Down                                   | -2.04                     |
| mmu-miR-207           | yes                                    | Down                                   | -1.98                     |
| mmu-miR-190b          | yes                                    | Down                                   | -1.89                     |
| mmu-miR-16            | yes                                    | Down                                   | -1.78                     |
| mmu-miR-346           | yes                                    | Down                                   | -1.74                     |
| mmu-miR103            | yes                                    | Down                                   | -1.66                     |
| mmu-miR-152           | yes                                    | Down                                   | -1.64                     |
| mmu-miR-292-3p        | yes                                    | Down                                   | -1.60                     |
| mmu-miR-145           | yes                                    | Down                                   | -1.55                     |
| mmu-miR-1             | yes                                    | Down                                   | -1.50                     |
| mmu-miR-15a           | yes                                    | Down                                   | -1.26                     |
| mmu-miR-31            | yes                                    | Down                                   | -1.26                     |
| mmu-miR-33            | yes                                    | Down                                   | -1.25                     |
| mmu-miR-211           | yes                                    | Down                                   | -1.16                     |
| mmu-miR-320           | yes                                    | Down                                   | -1.11                     |
| mmu-miR-99b           | yes                                    | Up                                     | 1.33                      |
| mmu-let-7i            | yes                                    | Up                                     | 1.59                      |
| mmu-miR-19b           | yes                                    | Up                                     | 1.59                      |

(Continued)

| <b>c-Myc miRNA signature</b> | <b>available in miRNA array of human HCCs</b> | <b>Up/Down regulation (c-myc vs. Control)</b> | <b>Fold change (log 2 value)</b> |
|------------------------------|-----------------------------------------------|-----------------------------------------------|----------------------------------|
| mmu-miR-125a-5p              | yes                                           | Up                                            | 2.16                             |
| mmu-miR-136                  | yes                                           | Up                                            | 2.23                             |
| mmu-miR-106a+mmu-miR-17      | yes                                           | Up                                            | 2.47                             |
| mmu-miR-296-5p               | yes                                           | Up                                            | 2.61                             |
| mmu-miR-20a+mmu-miR-20b      | yes                                           | Up                                            | 2.70                             |
| mmu-miR-19a                  | yes                                           | Up                                            | 2.78                             |
| mmu-miR-802                  | no                                            | Down                                          | -3.61                            |
| mmu-miR-1952                 | no                                            | Down                                          | -2.31                            |
| mmu-miR-1940                 | no                                            | Down                                          | -2.04                            |
| mghv-miR-M1-7-3p             | no                                            | Down                                          | -1.87                            |
| mcmv-miR-m108-2-5p.1         | no                                            | Down                                          | -1.86                            |
| mghv-miR-M1-5                | no                                            | Down                                          | -1.80                            |
| mmu-miR-1951                 | no                                            | Down                                          | -1.78                            |
| mmu-miR-676                  | no                                            | Down                                          | -1.69                            |
| mmu-miR-742                  | no                                            | Down                                          | -1.52                            |
| mmu-miR-717                  | no                                            | Down                                          | -1.51                            |
| mmu-miR-741                  | no                                            | Down                                          | -1.34                            |
| mmu-miR-544                  | no                                            | Down                                          | -1.28                            |
| mmu-miR-450b-5p              | no                                            | Down                                          | -1.18                            |
| mmu-miR-377                  | no                                            | Up                                            | 2.28                             |
| mmu-miR-411                  | no                                            | Up                                            | 2.29                             |
| mmu-miR-410                  | no                                            | Up                                            | 2.86                             |
| mmu-miR-1196                 | no                                            | Up                                            | 3.01                             |
| mmu-miR-369-3p               | no                                            | Up                                            | 3.33                             |
| mmu-miR-376c                 | no                                            | Up                                            | 3.79                             |
| mmu-miR-495                  | no                                            | Up                                            | 3.87                             |
| mmu-miR-376b                 | no                                            | Up                                            | 5.71                             |

**Supplementary Table 1D: Primer list of the miRNA used in the experiments**

| miRNA   | Forward primer                               | Reverse primer                          |
|---------|----------------------------------------------|-----------------------------------------|
| mir-101 | 5'-CCGGAATTCAATGACCTCTTTCTT<br>CTGC-3'       | 5'-ATACTCGAGGAAGAGTGGTGAACACAGGA-3'     |
| mir-107 | 5'-GCGGAATTCTTCTTTCTAACTGCCATT<br>ACTGCCG-3' | 5'-CCGCTCGAGTCTACTTCTCAACCCTTGTTCTTA-3' |
| mir-122 | 5'-TCGGAATTCGTTATTCAAGATCCC<br>GGGGCT -3'    | 5'-CGGCTCGAGCATAACATTACACACAATGGAG-3'   |
| mir-29  | 5'-GCGGAATTCATGTAATAAGCCTTCTCT<br>GG-3'      | 5'-CCGCTCGAGGAAAGTCAAGTTTAAGATAGG-3'    |
| mir-365 | 5'-CCGGAATTCCAAAGGTTACGTGTCTT<br>GGA-3'      | 5'-ATACTCGAGTGAGCACAGCAAGGGAGATG-3'     |
| mir-375 | 5'-TTGGAATTCACCTGTGGCGTCCGCC<br>ACTG-3'      | 5'-CGACTCGAGCAGTCTCTGCGACCCATATG-3'     |
| mir-378 | 5'-CTGGAATTCTAGAAGGCTCAGAG<br>CTGAGC-3'      | 5'-ATACTCGAGTCTCCGTCAGCACCACACCG-3'     |
| mir-802 | 5'-GCGGAATTCGCCTGCTCTGTCT<br>CCCAGC-3'       | 5'-CCGCTCGAGCTTGCAGCTGGAGTTCCATTGGC-3'  |
